# Supplementary figures and images for: Implementation challenges to patient safety in Guatemala: a mixed methods evaluation
Source: HighWire-hosted journal article supplement (doi:10.1136/bmjqs-2020-012552), 2021-05-26

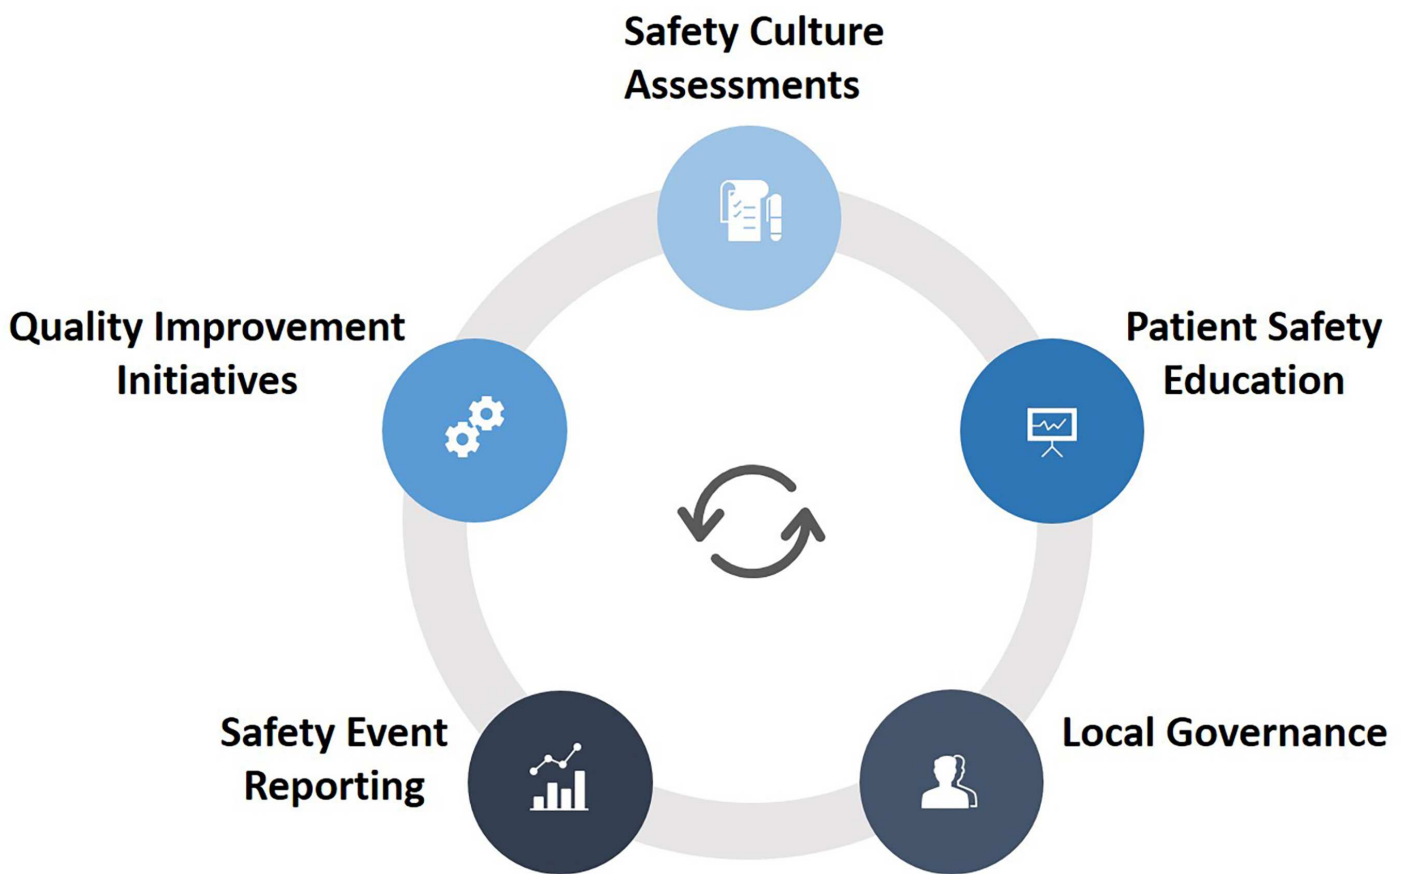

Supplement: bmjqs-2020-012552supp004_data_supplement.pdf [file bmjqs-2020-012552supp004_data_supplement.pdf]
